# Supplementary material
Source: publisher site journal article supplement (https://www.dovepress.com/get_supplementary_file.php?f=396826.docx)
Supplement: Supplementary file 1 [file get_supplementary_file.php]

**Questionnaire on willingness of nursing to participate in “Internet + nursing services”**

Dear nursing colleagues:

As a new medical model in the Internet era, “Internet + nursing service” can effectively relieve the pressure of medical treatment and reasonably allocate social medical resources. The practice of nurses going out alone can show nurses' professional quality and work strength, improve nurses' self-efficacy, and help to improve nurses' professional identity. The results of this survey can truly reflect the nurses' understanding of “Internet + nursing service” and the risk factors of door-to-door service, provide data for the government to improve the operation mode, and help improve relevant laws and regulations and provide relevant guidance for policy formulation, so that a safe service environment can be built. This is an anonymous questionnaire for academic purposes only. I would like to express my heartfelt thanks for your support and cooperation!

**General information**

1. Your gender?

Male Female

2.Your age:

3.Your professional title?

Primary Intermediate Senior

4. Your position?

Nurse Head nurse Chief nurse and over

5.Your highest education background?

Undergraduates and below Undergraduates and over

6. How long have you worked?

0-5 years 6-10 years 11-15 years More than 15 years

7. Your marital status?

Unmarried Divorce/Death of a spouse Married

8. Are you a specialist nurse?

Yes No

1. Do you have children?

No child One child Two children and more

10. What is your hospital level?

Third-level hospital Second-level hospital First-level hospital

**Investigation on the awareness of “Internet + nursing service”**

1.Your understanding of the relevant contents of the《“Healthy China 2030” Plan Outline》

Not at all Do not understand Commonly Well understood Very familiar

2.Your understanding of the relevant contents of the 《National Nursing Development Plan (2021-2025)》

Not at all Do not understand Commonly Well understood Very familiar

3.Your understanding of the relevant contents of the document 《Operation Plan for Pilot Cities of “Internet + Nursing Service”》

Not at all Do not understand Commonly Well understood Very familiar

4.Your understanding of the relevant contents of the document 《Opinions on Promoting the Development of “Internet + Health”》

Not at all Do not understand Commonly Well understood Very familiar

5.Your understanding of the concept of “Internet + nursing service”

Not at all Do not understand Commonly Well understood Very familiar

6.Your understanding of the service objects of “Internet + nursing service” (elderly or disabled elderly, convalescent patients, end-stage patients and other people with mobility difficulties)

Not at all Do not understand Commonly Well understood Very familiar

7.Your understanding of the service content of “Internet + nursing service” (providing chronic disease management, rehabilitation care, special care, health education, hospice care and other services)

Not at all Do not understand Commonly Well understood Very familiar

8.Your understanding of the admittance qualification of “Internet + nursing service” nurses

Not at all Do not understand Commonly Well understood Very familiar

9.You think “Internet + nursing service” can optimize the allocation of nursing resources

Disagree completely Disagree Agree Well agree Strongly agree

10.You think “Internet + nursing service” can reflect the value of nursing service and increase personal income

Disagree completely Disagree Agree Well agree Strongly agree

11.You think “Internet + nursing service” can broaden the path of practice development and promote the development of nursing discipline

Disagree completely Disagree Agree Well agree Strongly agree

12.You think that “Internet + nursing service” can improve the influence of hospitals and alleviate medical needs

Disagree completely Disagree Agree Well agree Strongly agree

13.Think that “Internet + nursing service” can improve the utilization rate of medical resources and alleviate the shortage of nursing staff

Disagree completely Disagree Agree Well agree Strongly agree

14.You think “Internet + nursing service” can improve the quality of nursing service

Disagree completely Disagree Agree Well agree Strongly agree

15.You think “Internet + Nursing Service” can facilitate patients and provide nursing services for more patients at home

Disagree completely Disagree Agree Well agree Strongly agree

16.You think the home care environment of “Internet + Nursing Service” is better

Disagree completely Disagree Agree Well agree Strongly agree

17.You think “Internet + Nursing Service” is very helpful to your work

Disagree completely Disagree Agree Well agree Strongly agree

18.Do you think “Internet + Nursing Service” can improve your life satisfaction and happiness

Disagree completely Disagree Agree Well agree Strongly agree

19.You think “Internet + Nursing Service” can have a high social status

Disagree completely Disagree Agree Well agree Strongly agree

20.Do you think there are potential personal safety hazards in “Internet+ Nursing Service”

Disagree completely Disagree Agree Well agree Strongly agree

21.Do you think that engaging in “Internet + Nursing Service” will reveal your personal information

Disagree completely Disagree Agree Well agree Strongly agree

22.Do you think engaging in "Internet + care services" will cause your property loss

Disagree completely Disagree Agree Well agree Strongly agree

23.Do you think “Internet + Nursing Service” will increase medical risks and disputes

Disagree completely Disagree Agree Well agree Strongly agree

24.In your opinion, “Internet + Nursing Service” lacks the personal safety guarantee of corresponding laws and regulations and supporting management systems when disputes arise

Disagree completely Disagree Agree Well agree Strongly agree

25.You are worried about the professional legitimacy of engaging in “Internet + Nursing Service”

Disagree completely Disagree Agree Well agree Strongly agree

26.You are worried about the residents' acceptance of “Internet + Nursing Service”

Disagree completely Disagree Agree Well agree Strongly agree

27.Do you think “Internet + Nursing Service” will affect the quality of nursing service

Disagree completely Disagree Agree Well agree Strongly agree

28.You are worried about the traffic problem of “Internet + Nursing Service”

Disagree completely Disagree Agree Well agree Strongly agree

29.You are worried about the medical insurance reimbursement of “Internet + Nursing Service”, which will increase the financial burden of patients

Disagree completely Disagree Agree Well agree Strongly agree

30.You think that “Internet + Nursing Service” affects the nursing order and quality of our hospital

Disagree completely Disagree Agree Well agree Strongly agree

31.Do you think “Internet + Nursing Service” will increase the difficulty of our hospital management

Disagree completely Disagree Agree Well agree Strongly agree

32.Do you think “Internet + Nursing Service” will affect the enthusiasm of the department

Disagree completely Disagree Agree Well agree Strongly agree

33.You think “Internet + Nursing Service” will increase the workload of nurses

Disagree completely Disagree Agree Well agree Strongly agree

34.You think “Internet + Nursing Service” will distract nurses from their work

Disagree completely Disagree Agree Well agree Strongly agree

35.You think it is necessary to establish a nurse training base of “Internet + Nursing Service”

Disagree completely Disagree Agree Well agree Strongly agree

36.You think it is necessary to carry out theoretical training for nurses of “Internet + Nursing Service”

Disagree completely Disagree Agree Well agree Strongly agree

37.You think it is necessary to carry out practical operation training for nurses of “Internet + Nursing Service”

Disagree completely Disagree Agree Well agree Strongly agree

38.You think it is necessary to carry out specialized training for nurses of “Internet + Nursing Service”

Disagree completely Disagree Agree Well agree Strongly agree

39.You think it is necessary to carry out general training for nurses of “Internet + Nursing Service”

Disagree completely Disagree Agree Well agree Strongly agree

40.Do you think it is necessary to conduct workflow training for nurses of “Internet + Nursing Service”

Disagree completely Disagree Agree Well agree Strongly agree

41.Do you think it is necessary to conduct qualification training for nurses of “Internet + Nursing Service”

Disagree completely Disagree Agree Well agree Strongly agree

42.Do you think it is necessary to assess the ability of nurses in “Internet plus Nursing Service”

Disagree completely Disagree Agree Well agree Strongly agree

43.You think it is necessary to carry out pre job training for nurses of “Internet + Nursing Service”

Disagree completely Disagree Agree Well agree Strongly agree

44.Do you think it is necessary to conduct mid-term training for nurses of “Internet + Nursing Service”

Disagree completely Disagree Agree Well agree Strongly agree

45.You think it is necessary to train nurses of “Internet + Nursing Service” on risk prevention knowledge

Disagree completely Disagree Agree Well agree Strongly agree

46.Do you think it is necessary to train nurses of “Internet plus Nursing Service” in the process of handling adverse events

Disagree completely Disagree Agree Well agree Strongly agree

47.Do you think it is necessary to train nurses of “Internet + Nursing Service” in emergency plan and complication handling

Disagree completely Disagree Agree Well agree Strongly agree

48.Do you think it is necessary to train nurses of “Internet + Nursing Service” in language and behavior standards

Disagree completely Disagree Agree Well agree Strongly agree

49.Do you think it is necessary to conduct health education knowledge training for nurses of “Internet + Nursing Service”

Disagree completely Disagree Agree Well agree Strongly agree

50.You think it is necessary to conduct psychological nursing training for nurses of “Internet + Nursing Service”

Disagree completely Disagree Agree Well agree Strongly agree

51.You think it is necessary to train nurses of “Internet + Nursing Service” in nurse patient communication skills

Disagree completely Disagree Agree Well agree Strongly agree

52.You think it is necessary to conduct ethics training for nurses of “Internet + Nursing Service”

Disagree completely Disagree Agree Well agree Strongly agree

53.Do you think it is necessary to conduct professional etiquette training for nurses of “Internet + Nursing Service”
